# Supplementary material for: Genomic Epidemiology and Transmission Dynamics of Global Coxsackievirus B4
Source: MDPI journal article supplement (doi:10.3390/v15020569), 2023-02-19
Supplement: s1 [file s1]

# Genomic Epidemiology and Transmission Dynamics of Global Coxsackievirus B4

Jinbo Xiao <sup>1</sup>, Jianxing Wang <sup>2</sup>, Huanhuan Lu <sup>1</sup>, Yang Song <sup>1</sup>, Dapeng Sun <sup>2</sup>, Zhenzhi Han <sup>3</sup>, Jichen Li <sup>1</sup>, Qian Yang <sup>1</sup>, Dongmei Yan <sup>1</sup>, Shuangli Zhu <sup>1</sup>, Yaowen Pei <sup>2</sup>, Xianjun Wang <sup>2</sup>, Wenbo Xu <sup>1,4</sup> and Yong Zhang <sup>1,4,\*</sup>

- <sup>1</sup> WHO WPRO Regional Polio Reference Laboratory, National Laboratory for Poliomyelitis and National Health Commission Key Laboratory of Biosafety, National Institute for Viral Disease Control and Prevention, Chinese Center for Disease Control and Prevention, Beijing 102206, China
- <sup>2</sup> Shandong Center for Disease Control and Prevention, Jinan 250014, China
- <sup>3</sup> Laboratory of Virology, Beijing Key Laboratory of Etiology of Viral Diseases in Children, Capital Institute of Pediatrics, Beijing 102206, China
- <sup>4</sup> Center for Biosafety Mega-Science, Chinese Academy of Sciences, Wuhan 430071, China
- \* Correspondence: yongzhang75@sina.com

**Figure S1. ML tree of the VP1 region of 225 CVB4 sequences.** Of the 225 sequences, 40 were obtained by sequencing in this study, and the remaining 185 were obtained from GenBank database. The green part was clade1, which contained the E genotype, and the orange part was clade2, which contained the sequences of B, C, D genotypes. "0.07" is a component of the distance scale of the evolutionary tree, which indicates the unit length of the difference between sequences".

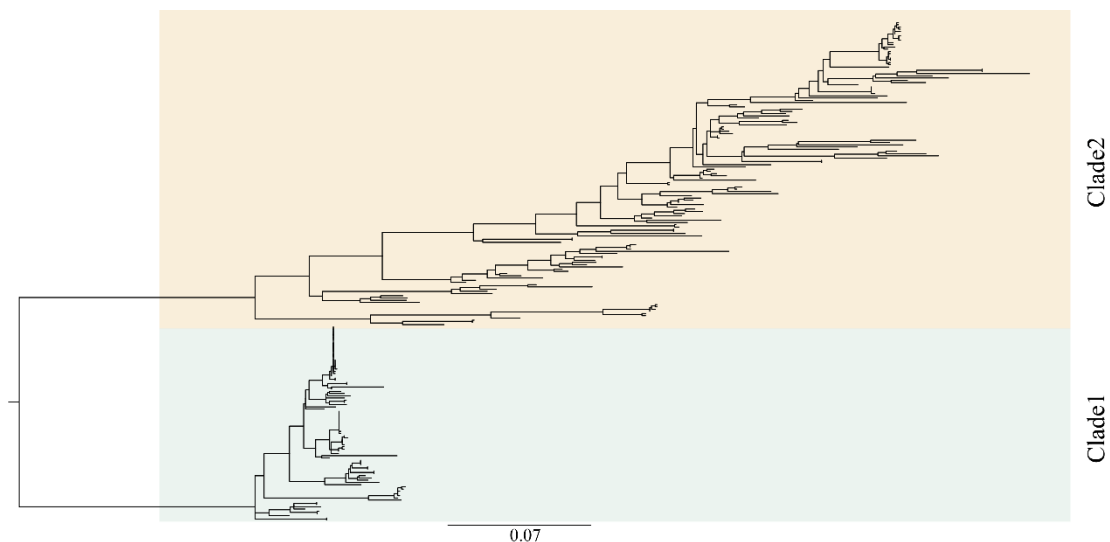

**Figure S2. Results of root-to-tip regression analysis and date-randomization tests (DRT) on the *VP1* region of the dataset sequence.** The results of the root-to-tip regression analysis were shown on the left, and histograms summarized the frequency of the sequences collected at different times and countries. The DRT results were shown on the right. Only if the 95% credibility interval of the rate estimate does not fall within the 95% credibility intervals of the rate estimates from the date-randomized replicates, the dataset was considered to have sufficient temporal signal for molecular dating. A)186 *VP1* sequences for temporal dynamics analysis. B)60 *VP1* sequences for phylogeographic analysis.

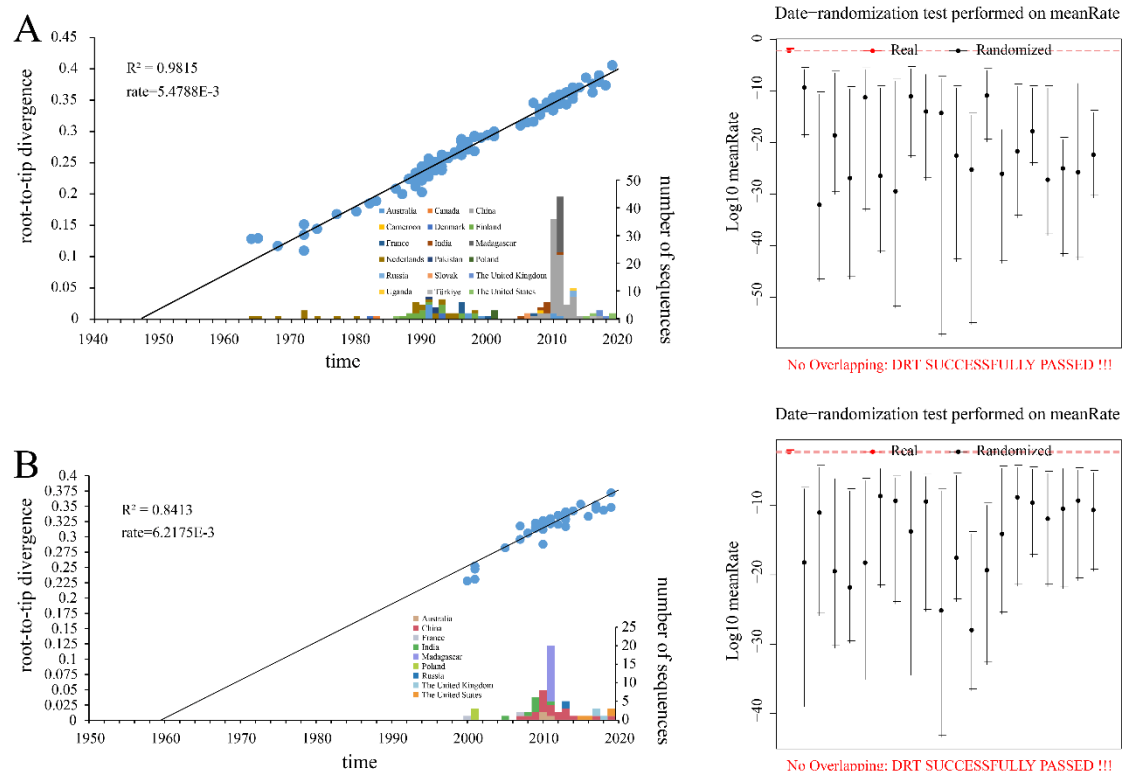

**Figure S3. ML trees of different partitions of 80 sequences.** Nine diagrams (A-I) contained ML trees of all partitions (*VP2*, *VP3*, *VP4*, *2A*, *2B*, *2C*, *3AB*, *3C* and *3D<sup>pol</sup>*) of 80 sequences except *VP1* (shown in Fig. 1), and each ML tree branch was filled with colors according to different lineages, and branches belonging to the same lineage were indicated by triangles.

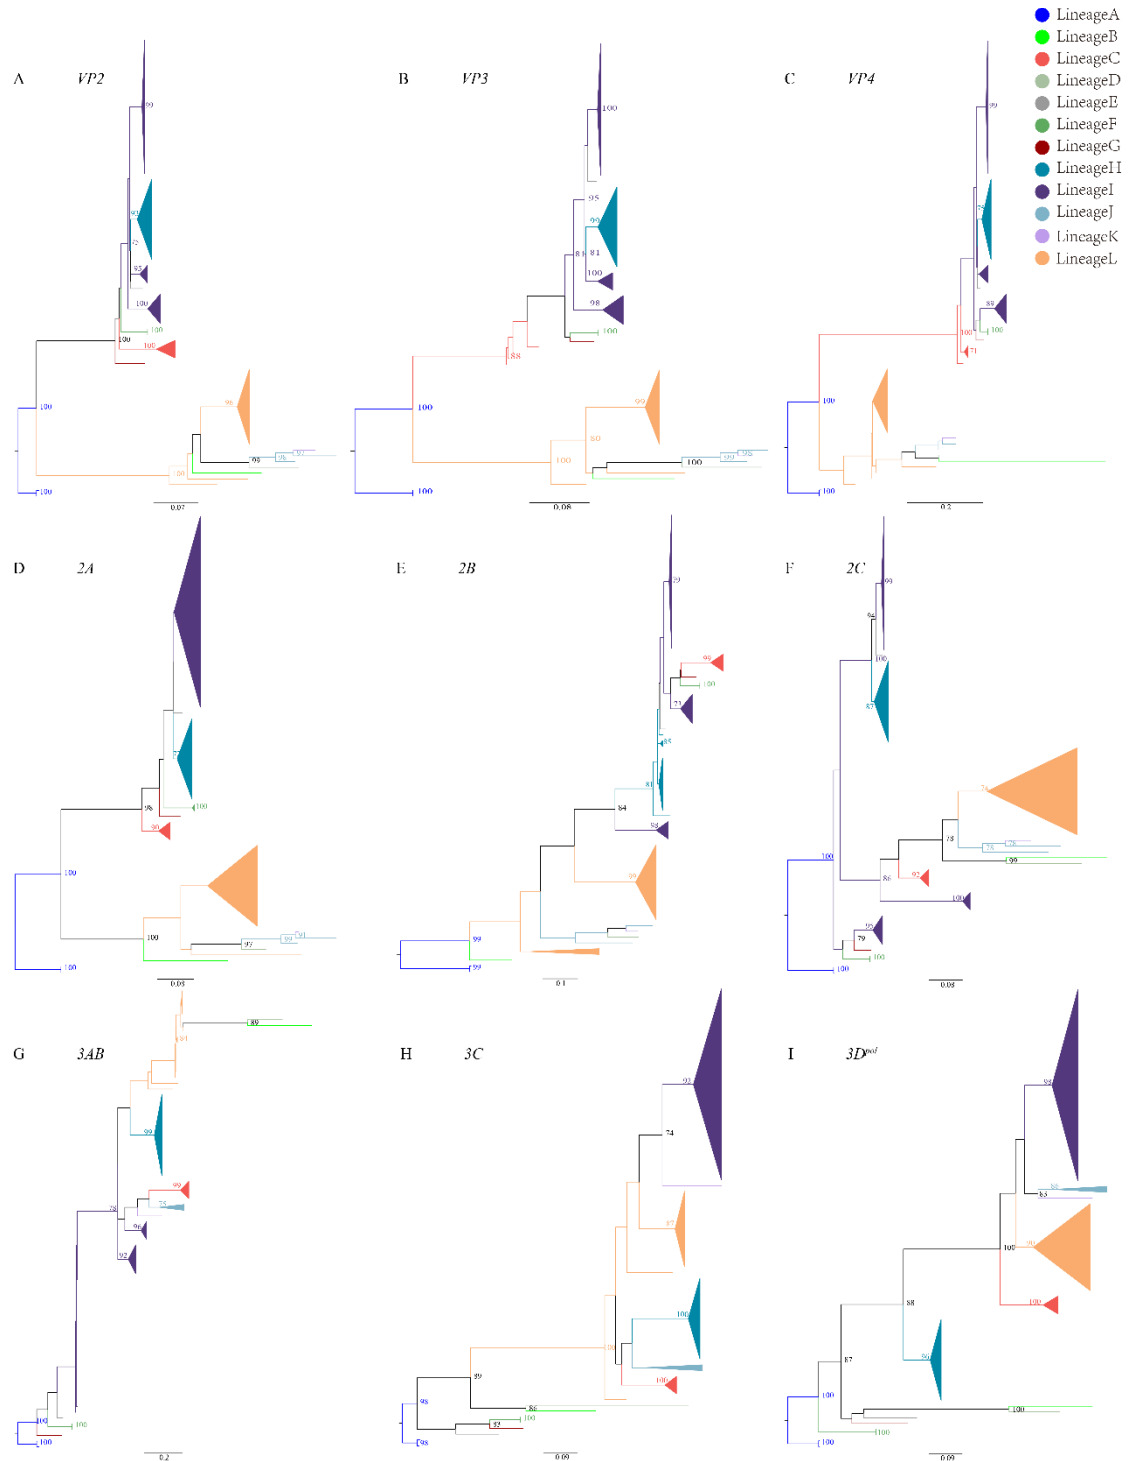

**Figure S4. Nucleotide similarity heatmap of CVB4 isolated from AIP group and HCP group.** Nucleotide similarity heatmaps of all other partitions except for the *VP1* region (shown in Fig. 1) were displayed in the figure.

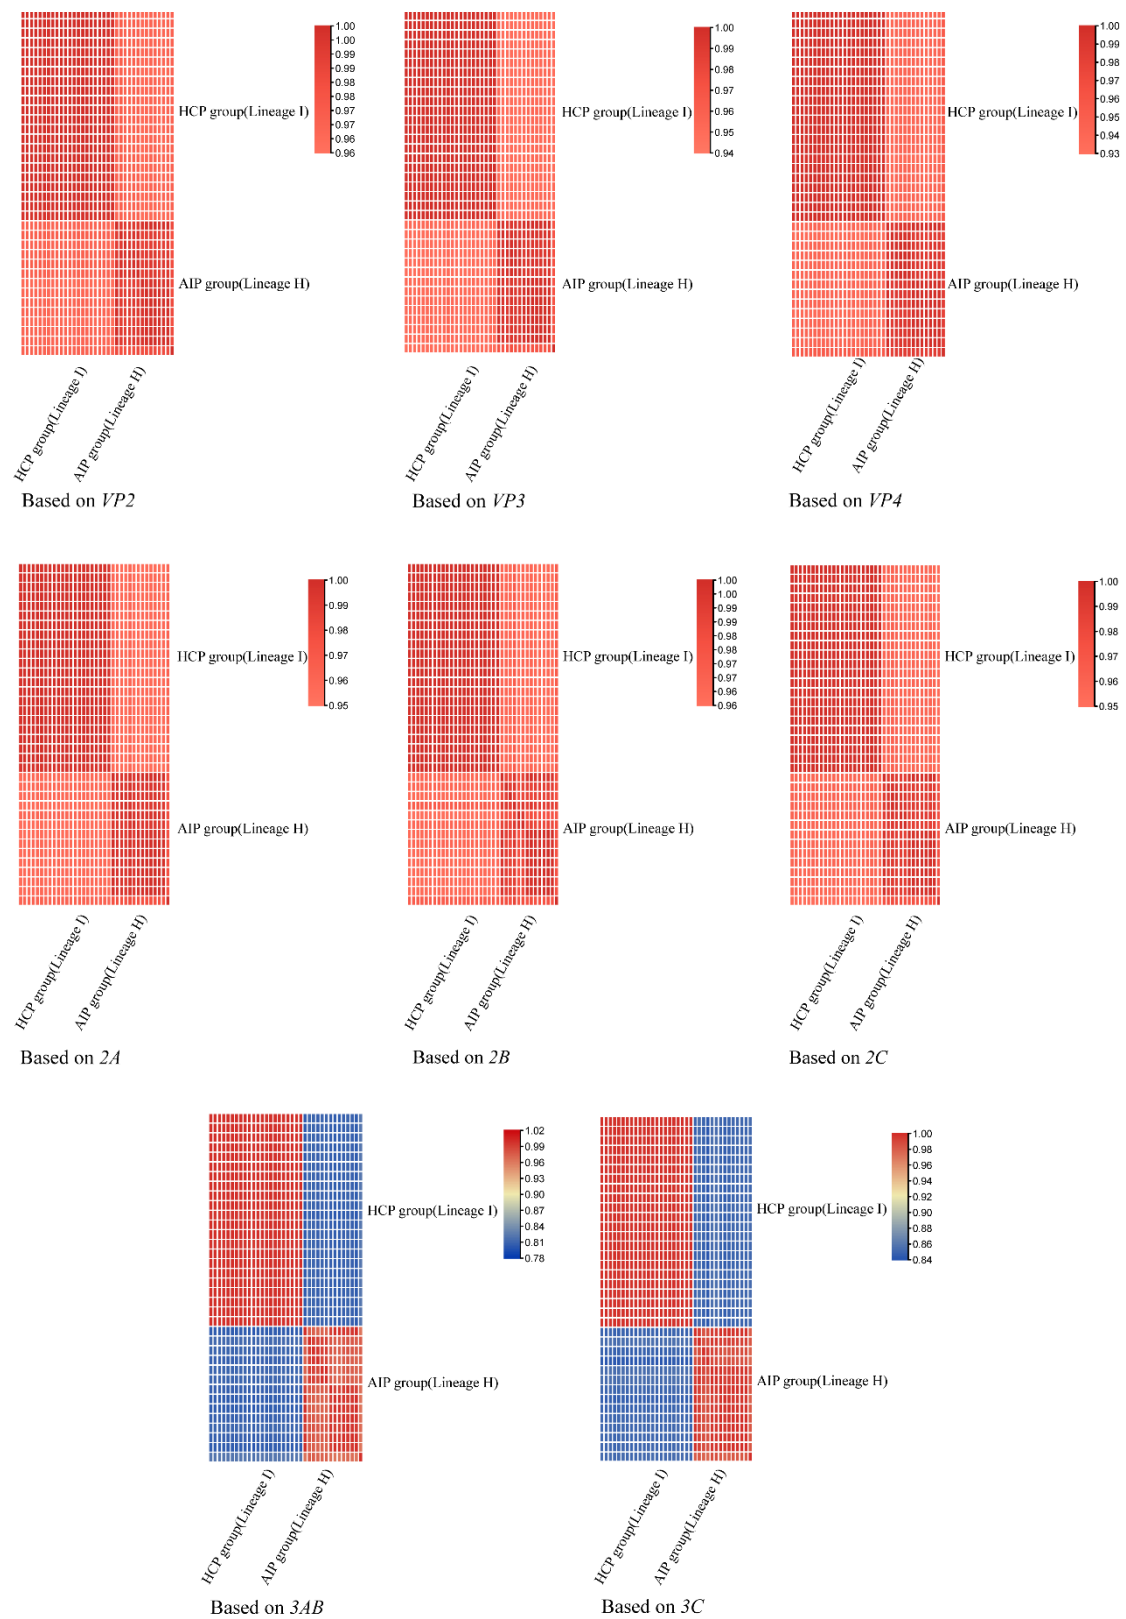

**Figure S5. Process of recombination analysis.** The recombination analysis process of CVB4 isolated from AIP group and HCP group went through three processes: searching for potential recombinant sequences by BLAST, primary screening of RDP4, and determination by SimPlot.

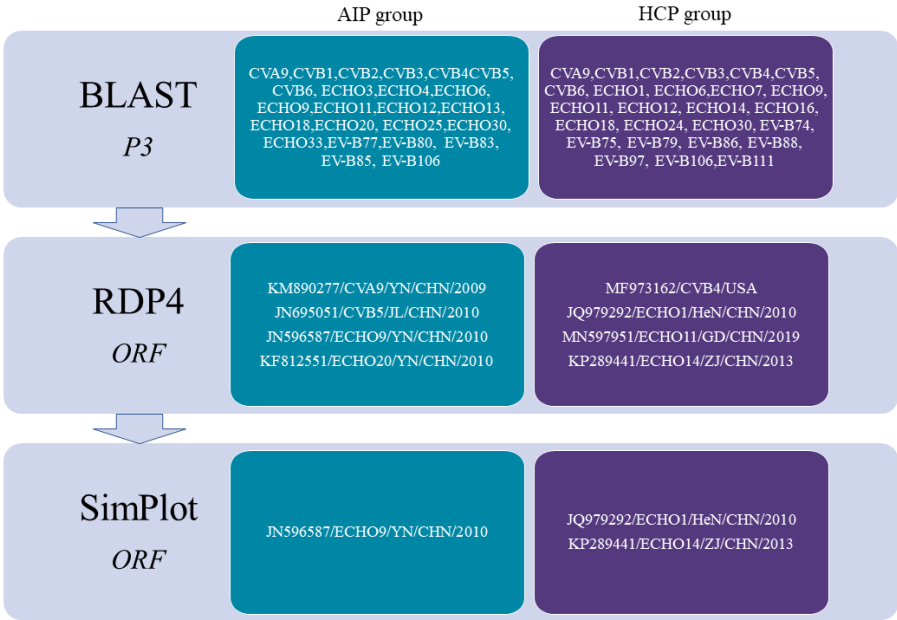

**Figure S6. Results of nucleotide entropy analysis of the CVB4 *P3* region isolated from AIP group and HCP group.** Nucleotide entropy values greater than 0.8 were considered to be highly variable.

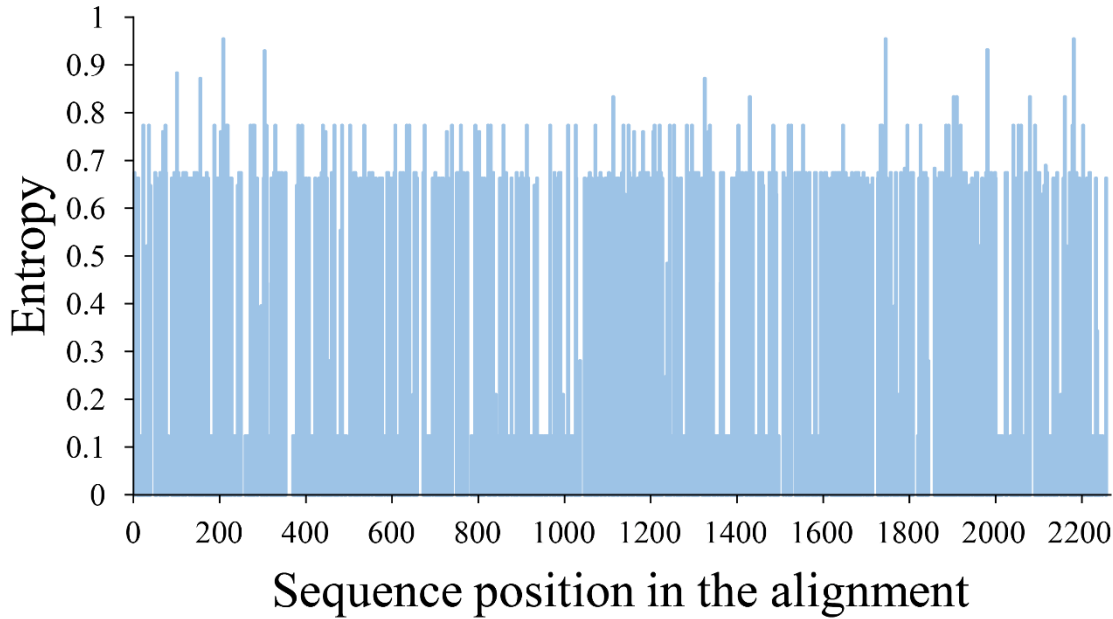

**Figure S7. Sequence alignment of CVB4 encoding the protease (3C).** Enteroviruses involved in the analysis include the CVB4 prototype strain, CVB4 isolated from AIP group and HCP group, E1, E9, E14, CVB3 and EV-A71. The secondary structure elements of CVB4 protease (3C) were marked at the top of the alignment; curves and arrows represented  $\alpha$ -helices and  $\beta$ -chains, respectively. The number of residues labeled with the sequence of the CVB4 prototype protease (3C), and the cyan square marks represented the amino acid sites that differ between AIP group and HCP group.

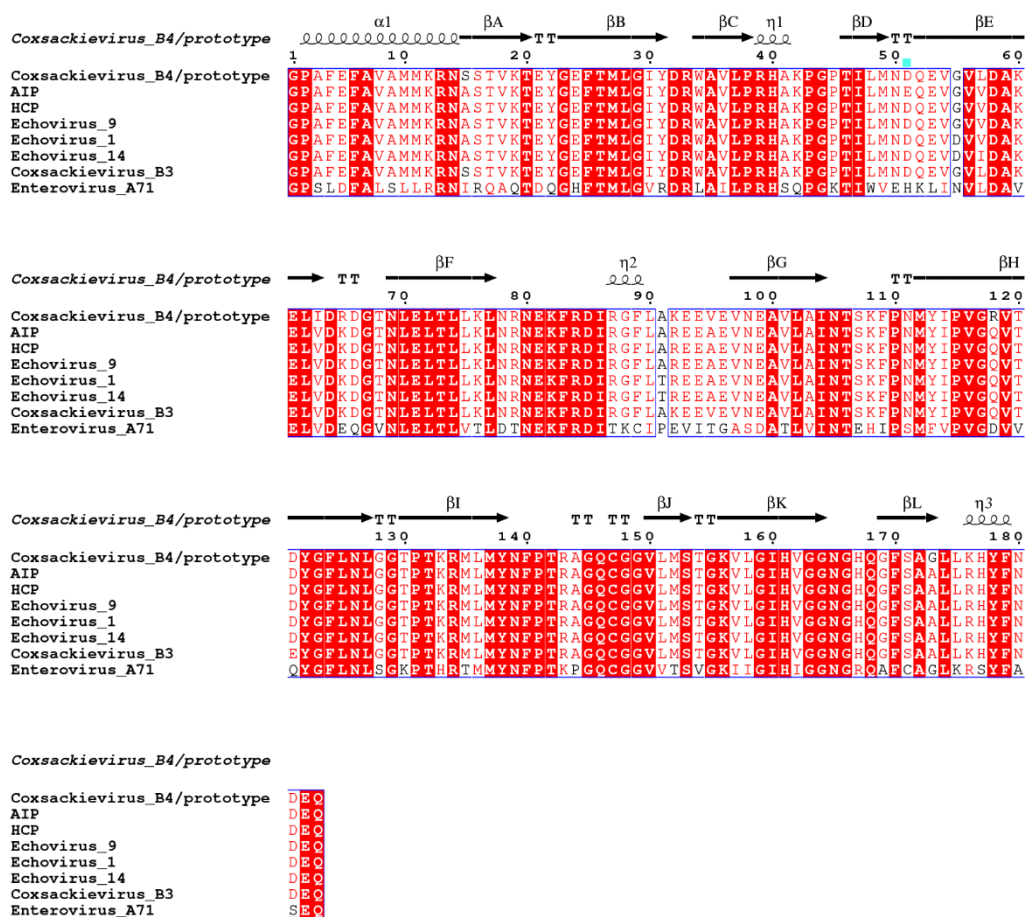

**Table S1.** Information on 80 global CVB4 for phylogenetic analysis.

| Strain name/Genbank<br>No. | Country              | Isolated<br>year | Genotyp<br>e | Evolutionary<br>lineage | Source        |
|----------------------------|----------------------|------------------|--------------|-------------------------|---------------|
| DQ480420                   | Italy                | NA               | A            | A                       | GenBank       |
| X05690                     | the United<br>States | 1951             | A            | A                       | GenBank       |
| LS451289                   | Romania              | 1986             | D            | B                       | GenBank       |
| MF678347                   | Australia            | 2007             | E            | C                       | GenBank       |
| MF422559                   | China                | 2008             | E            | C                       | GenBank       |
| MF422560                   | China                | 2008             | E            | C                       | GenBank       |
| MF422562                   | China                | 2008             | E            | C                       | GenBank       |
| JX417724                   | Cameroon             | 2008             | D            | D                       | GenBank       |
| KM890276                   | China                | 2009             | E            | E                       | GenBank       |
| MF678300                   | Australia            | 2010             | E            | F                       | GenBank       |
| MF678319                   | Australia            | 2010             | E            | F                       | GenBank       |
| KF781524                   | China                | 2010             | E            | G                       | GenBank       |
| KU566507                   | China                | 2013             | E            | H                       | GenBank       |
| LYLS201                    | China                | 2010             | E            | H                       | This<br>study |
| LYLS213                    | China                | 2010             | E            | H                       | This<br>study |
| LYLS216                    | China                | 2010             | E            | H                       | This<br>study |
| LYLS258                    | China                | 2010             | E            | H                       | This<br>study |
| LYLS328                    | China                | 2010             | E            | H                       | This<br>study |
| LYLS332                    | China                | 2010             | E            | H                       | This<br>study |
| LYLS345                    | China                | 2010             | E            | H                       | This<br>study |
| LYLS359                    | China                | 2010             | E            | H                       | This<br>study |
| LYLS361                    | China                | 2010             | E            | H                       | This<br>study |
| LYLS365                    | China                | 2010             | E            | H                       | This<br>study |
| LYLS369                    | China                | 2010             | E            | H                       | This<br>study |
| LYLS372                    | China                | 2010             | E            | H                       | This<br>study |
| LYLS413                    | China                | 2010             | E            | H                       | This<br>study |

|         |       |      |   |   |            |
|---------|-------|------|---|---|------------|
| LYLS436 | China | 2010 | E | H | This study |
| 22      | China | 2011 | E | I | This study |
| 25      | China | 2011 | E | I | This study |
| 27      | China | 2011 | E | I | This study |
| 36R     | China | 2011 | E | I | This study |
| 40      | China | 2011 | E | I | This study |
| 44      | China | 2011 | E | I | This study |
| 46      | China | 2011 | E | I | This study |
| 48      | China | 2011 | E | I | This study |
| 52      | China | 2011 | E | I | This study |
| 54      | China | 2011 | E | I | This study |
| 56      | China | 2011 | E | I | This study |
| 57R     | China | 2011 | E | I | This study |
| 58R     | China | 2011 | E | I | This study |
| 59H     | China | 2011 | E | I | This study |
| 62R     | China | 2011 | E | I | This study |
| 63R     | China | 2011 | E | I | This study |
| 66      | China | 2011 | E | I | This study |
| 67      | China | 2011 | E | I | This study |
| 68      | China | 2011 | E | I | This study |
| 70      | China | 2011 | E | I | This study |
| 71      | China | 2011 | E | I | This study |



|          |                   |      |   |   |            |
|----------|-------------------|------|---|---|------------|
| 74       | China             | 2011 | E | I | This study |
| JX018    | China             | 2010 | E | I | This study |
| JX045    | China             | 2010 | E | I | This study |
| JX308222 | China             | 2010 | E | I | GenBank    |
| KF781525 | China             | 2010 | E | I | GenBank    |
| KP289433 | China             | 2013 | E | I | GenBank    |
| KX752784 | China             | 2013 | E | I | GenBank    |
| LYLS141  | China             | 2010 | E | I | This study |
| LYLS390  | China             | 2010 | E | I | This study |
| MF179585 | China             | 2013 | E | I | GenBank    |
| MF179586 | China             | 2014 | E | I | GenBank    |
| MF179587 | China             | 2013 | E | I | GenBank    |
| MF179588 | China             | 2013 | E | I | GenBank    |
| KF878966 | Australia         | 2011 | D | J | GenBank    |
| MN590273 | France            | 2019 | D | J | GenBank    |
| KY369904 | the United States | 2016 | D | K | GenBank    |
| KC558559 | Denmark           | NA   | G | L | GenBank    |
| KC558560 | Denmark           | NA   | B | L | GenBank    |
| KC558561 | Denmark           | NA   | B | L | GenBank    |
| KC558562 | Denmark           | NA   | B | L | GenBank    |
| KC558563 | Denmark           | NA   | B | L | GenBank    |
| KC558564 | Denmark           | NA   | B | L | GenBank    |
| KC558565 | Denmark           | NA   | B | L | GenBank    |
| KC558566 | Denmark           | NA   | B | L | GenBank    |
| KC558567 | Denmark           | NA   | B | L | GenBank    |
| KC558568 | Denmark           | NA   | B | L | GenBank    |
| KC558569 | Denmark           | NA   | B | L | GenBank    |
| KC558570 | Denmark           | NA   | B | L | GenBank    |
| KC558571 | Denmark           | NA   | B | L | GenBank    |
| KC558572 | Denmark           | NA   | B | L | GenBank    |
| KC558573 | Denmark           | NA   | B | L | GenBank    |
| AF311939 | NA                | NA   | F | L | GenBank    |

---

**Table S2.** Information on 186 CVB4 for Bayesian phylodynamics analysis.

| Strain name/GenBank No. | Country     | Isolated year | Genotype | Source     |
|-------------------------|-------------|---------------|----------|------------|
| 22                      | China       | 2011          | E        | This study |
| 25                      | China       | 2011          | E        | This study |
| 27                      | China       | 2011          | E        | This study |
| 36R                     | China       | 2011          | E        | This study |
| 40                      | China       | 2011          | E        | This study |
| 44                      | China       | 2011          | E        | This study |
| 46                      | China       | 2011          | E        | This study |
| 48                      | China       | 2011          | E        | This study |
| 52                      | China       | 2011          | E        | This study |
| 54                      | China       | 2011          | E        | This study |
| 56                      | China       | 2011          | E        | This study |
| 57R                     | China       | 2011          | E        | This study |
| 58R                     | China       | 2011          | E        | This study |
| 59H                     | China       | 2011          | E        | This study |
| 62R                     | China       | 2011          | E        | This study |
| 63R                     | China       | 2011          | E        | This study |
| 66                      | China       | 2011          | E        | This study |
| 67                      | China       | 2011          | E        | This study |
| 68                      | China       | 2011          | E        | This study |
| 70                      | China       | 2011          | E        | This study |
| 71                      | China       | 2011          | E        | This study |
| 74                      | China       | 2011          | E        | This study |
| AF159998                | Netherlands | 1965          | C        | GenBank    |
| AF159999                | Netherlands | 1964          | C        | GenBank    |
| AF160000                | Netherlands | 1972          | C        | GenBank    |
| AF160008                | Netherlands | 1977          | D        | GenBank    |
| AF160010                | Denmark     | 1993          | D        | GenBank    |
| AF160011                | Denmark     | 1993          | D        | GenBank    |
| AF160012                | Finland     | 1993          | D        | GenBank    |
| AF160014                | Finland     | 1990          | D        | GenBank    |
| AF160015                | Finland     | 1989          | D        | GenBank    |
| AF160016                | France      | 1996          | D        | GenBank    |
| AF160017                | France      | 1996          | D        | GenBank    |
| AF160018                | Pakistan    | 1992          | D        | GenBank    |
| AF160019                | Pakistan    | 1992          | D        | GenBank    |
| AF160020                | Netherlands | 1993          | D        | GenBank    |
| AF160021                | Netherlands | 1993          | D        | GenBank    |
| AF160022                | Netherlands | 1994          | D        | GenBank    |
| AF160023                | Netherlands | 1994          | D        | GenBank    |
| AF160024                | France      | 1996          | D        | GenBank    |
| AF160025                | Finland     | 1998          | D        | GenBank    |

|          |                   |      |   |         |
|----------|-------------------|------|---|---------|
| AF160026 | Finland           | 1998 | D | GenBank |
| AF160027 | Netherlands       | 1998 | D | GenBank |
| AF160028 | Finland           | 1996 | D | GenBank |
| AF160029 | Netherlands       | 1992 | D | GenBank |
| AF160030 | Netherlands       | 1990 | D | GenBank |
| AF160031 | Finland           | 1989 | D | GenBank |
| AF160032 | Netherlands       | 1989 | D | GenBank |
| AF160033 | The United States | 1986 | D | GenBank |
| AF160034 | Finland           | 1993 | D | GenBank |
| AF160035 | Finland           | 1990 | D | GenBank |
| AF160036 | Netherlands       | 1995 | D | GenBank |
| AF160037 | Netherlands       | 1995 | D | GenBank |
| AF160038 | Finland           | 1996 | D | GenBank |
| AF160039 | France            | 1996 | D | GenBank |
| AF160040 | Finland           | 1988 | D | GenBank |
| AF160041 | Finland           | 1988 | D | GenBank |
| AF160042 | Netherlands       | 1992 | D | GenBank |
| AF160043 | Netherlands       | 1990 | D | GenBank |
| AF160044 | Netherlands       | 1991 | D | GenBank |
| AF160045 | Finland           | 1991 | D | GenBank |
| AF160046 | Finland           | 1993 | D | GenBank |
| AF160047 | Pakistan          | 1991 | D | GenBank |
| AF160049 | Netherlands       | 1980 | B | GenBank |
| AF160050 | Netherlands       | 1974 | B | GenBank |
| AF160051 | Netherlands       | 1972 | B | GenBank |
| AF160052 | Netherlands       | 1968 | B | GenBank |
| AF160053 | Netherlands       | 1972 | B | GenBank |
| AF160055 | Netherlands       | 1989 | B | GenBank |
| AF160056 | Netherlands       | 1989 | B | GenBank |
| AF160057 | Netherlands       | 1989 | B | GenBank |
| AF160060 | Finland           | 1987 | B | GenBank |
| AF160061 | Canada            | 1983 | B | GenBank |
| AF160062 | Denmark           | 1982 | B | GenBank |
| AF160064 | Finland           | 1990 | B | GenBank |
| FJ868288 | Australia         | 1991 | D | GenBank |
| FJ868289 | Australia         | 1991 | D | GenBank |
| FJ868330 | Australia         | 1991 | D | GenBank |
| FJ868331 | Australia         | 1991 | D | GenBank |
| FJ868332 | Australia         | 1991 | D | GenBank |
| GU142875 | Australia         | 1997 | B | GenBank |
| GU142876 | Australia         | 1997 | D | GenBank |
| GU142877 | Australia         | 1999 | D | GenBank |
| HF948089 | France            | 2000 | D | GenBank |
| HF948090 | France            | 2007 | D | GenBank |

|          |            |      |   |            |
|----------|------------|------|---|------------|
| JF794741 | China      | 2010 | E | GenBank    |
| JN016524 | China      | 2010 | E | GenBank    |
| JX018    | China      | 2010 | E | This study |
| JX045    | China      | 2010 | E | This study |
| JX308222 | China      | 2010 | E | GenBank    |
| JX417724 | Cameroon   | 2008 | D | GenBank    |
| JX513577 | India      | 2009 | D | GenBank    |
| JX513579 | India      | 2009 | D | GenBank    |
| JX513580 | India      | 2009 | D | GenBank    |
| JX513581 | India      | 2009 | D | GenBank    |
| JX513583 | India      | 2008 | D | GenBank    |
| KC867091 | China      | 2008 | E | GenBank    |
| KC867092 | China      | 2008 | E | GenBank    |
| KC867093 | China      | 2009 | E | GenBank    |
| KF177118 | India      | 2011 | D | GenBank    |
| KF412921 | India      | 2005 | D | GenBank    |
| KF781519 | China      | 2007 | E | GenBank    |
| KF781520 | China      | 2010 | E | GenBank    |
| KF781521 | China      | 2010 | E | GenBank    |
| KF781522 | China      | 2010 | E | GenBank    |
| KF781523 | China      | 2010 | E | GenBank    |
| KF781524 | China      | 2010 | E | GenBank    |
| KF781525 | China      | 2010 | E | GenBank    |
| KF878966 | Australia  | 2011 | D | GenBank    |
| KJ933328 | China      | 2013 | E | GenBank    |
| KJ933329 | China      | 2013 | E | GenBank    |
| KM890276 | China      | 2009 | E | GenBank    |
| KP289433 | China      | 2013 | E | GenBank    |
| KR232695 | Madagascar | 2011 | D | GenBank    |
| KR232711 | Madagascar | 2011 | D | GenBank    |
| KR232712 | Madagascar | 2011 | D | GenBank    |
| KR232730 | Madagascar | 2011 | D | GenBank    |
| KR232731 | Madagascar | 2011 | D | GenBank    |
| KR232732 | Madagascar | 2011 | D | GenBank    |
| KR232739 | Madagascar | 2011 | D | GenBank    |
| KR232743 | Madagascar | 2011 | D | GenBank    |
| KR232751 | Madagascar | 2011 | D | GenBank    |
| KR232758 | Madagascar | 2011 | D | GenBank    |
| KR232760 | Madagascar | 2011 | D | GenBank    |
| KR232761 | Madagascar | 2011 | D | GenBank    |
| KR232763 | Madagascar | 2011 | D | GenBank    |
| KR232775 | Madagascar | 2011 | D | GenBank    |
| KR232776 | Madagascar | 2011 | D | GenBank    |
| KR232778 | Madagascar | 2011 | D | GenBank    |

|          |                    |      |   |            |
|----------|--------------------|------|---|------------|
| KR232782 | Madagascar         | 2011 | D | GenBank    |
| KR232792 | Madagascar         | 2011 | D | GenBank    |
| KR232793 | Madagascar         | 2011 | D | GenBank    |
| KR232796 | Madagascar         | 2011 | D | GenBank    |
| KU189236 | Poland             | 2001 | D | GenBank    |
| KU189240 | Poland             | 2001 | D | GenBank    |
| KU189242 | Poland             | 2001 | D | GenBank    |
| KU566507 | China              | 2013 | E | GenBank    |
| KU841463 | Russia             | 2013 | D | GenBank    |
| KU841464 | Russia             | 2013 | D | GenBank    |
| KX752784 | China              | 2013 | E | GenBank    |
| KY369904 | The United States  | 2016 | D | GenBank    |
| LC412980 | China              | 2017 | E | GenBank    |
| LYLS141  | China              | 2010 | E | This study |
| LYLS201  | China              | 2010 | E | This study |
| LYLS213  | China              | 2010 | E | This study |
| LYLS216  | China              | 2010 | E | This study |
| LYLS258  | China              | 2010 | E | This study |
| LYLS328  | China              | 2010 | E | This study |
| LYLS332  | China              | 2010 | E | This study |
| LYLS345  | China              | 2010 | E | This study |
| LYLS359  | China              | 2010 | E | This study |
| LYLS361  | China              | 2010 | E | This study |
| LYLS365  | China              | 2010 | E | This study |
| LYLS369  | China              | 2010 | E | This study |
| LYLS372  | China              | 2010 | E | This study |
| LYLS390  | China              | 2010 | E | This study |
| LYLS413  | China              | 2010 | E | This study |
| LYLS436  | China              | 2010 | E | This study |
| MF179585 | China              | 2013 | E | GenBank    |
| MF179586 | China              | 2014 | E | GenBank    |
| MF179587 | China              | 2013 | E | GenBank    |
| MF179588 | China              | 2013 | E | GenBank    |
| MF678300 | Australia          | 2010 | E | GenBank    |
| MF678319 | Australia          | 2010 | E | GenBank    |
| MG451808 | The United Kingdom | 2017 | D | GenBank    |
| MG845888 | The United States  | 2015 | D | GenBank    |
| MG922519 | China              | 2012 | E | GenBank    |
| MG922520 | China              | 2012 | E | GenBank    |
| MG922521 | China              | 2012 | E | GenBank    |
| MG922522 | China              | 2012 | E | GenBank    |
| MG922523 | China              | 2012 | E | GenBank    |
| MH685712 | Uganda             | 2013 | D | GenBank    |
| MK044541 | Türkiye            | 2016 | D | GenBank    |

|          |                    |      |   |         |
|----------|--------------------|------|---|---------|
| MN896919 | The United States  | 2019 | D | GenBank |
| MN896920 | The United States  | 2019 | D | GenBank |
| MT109013 | China              | 2010 | E | GenBank |
| MT109015 | China              | 2010 | E | GenBank |
| MT109017 | China              | 2010 | E | GenBank |
| MT109022 | China              | 2010 | E | GenBank |
| MT109023 | China              | 2010 | E | GenBank |
| MT109024 | China              | 2010 | E | GenBank |
| MT109026 | China              | 2010 | E | GenBank |
| MT641357 | The United Kingdom | 2017 | D | GenBank |
| MT641411 | The United Kingdom | 2018 | D | GenBank |
| MW390788 | Slovak             | 2006 | D | GenBank |
| MW390789 | Slovak             | 2006 | D | GenBank |

**Table S3.** Information on 60 global CVB4 for phylogeographic analysis.

| Strain name/GenBank No. | Country    | Isolated year | Genotype | Source     |
|-------------------------|------------|---------------|----------|------------|
| 22                      | China      | 2011          | E        | This study |
| 25                      | China      | 2011          | E        | This study |
| 71                      | China      | 2011          | E        | This study |
| HF948089                | France     | 2000          | D        | GenBank    |
| HF948090                | France     | 2007          | D        | GenBank    |
| JF794741                | China      | 2010          | E        | GenBank    |
| JX018                   | China      | 2010          | E        | This study |
| JX513577                | India      | 2009          | D        | GenBank    |
| JX513579                | India      | 2009          | D        | GenBank    |
| JX513580                | India      | 2009          | D        | GenBank    |
| JX513581                | India      | 2009          | D        | GenBank    |
| JX513583                | India      | 2008          | D        | GenBank    |
| KC867092                | China      | 2008          | E        | GenBank    |
| KC867093                | China      | 2009          | E        | GenBank    |
| KF177118                | India      | 2011          | D        | GenBank    |
| KF412921                | India      | 2005          | D        | GenBank    |
| KF781519                | China      | 2007          | E        | GenBank    |
| KF781520                | China      | 2010          | E        | GenBank    |
| KF878966                | Australia  | 2011          | D        | GenBank    |
| KJ933328                | China      | 2013          | E        | GenBank    |
| KM890276                | China      | 2009          | E        | GenBank    |
| KP289433                | China      | 2013          | E        | GenBank    |
| KR232695                | Madagascar | 2011          | D        | GenBank    |
| KR232712                | Madagascar | 2011          | D        | GenBank    |
| KR232730                | Madagascar | 2011          | D        | GenBank    |
| KR232731                | Madagascar | 2011          | D        | GenBank    |

|          |                    |      |   |            |
|----------|--------------------|------|---|------------|
| KR232739 | Madagascar         | 2011 | D | GenBank    |
| KR232743 | Madagascar         | 2011 | D | GenBank    |
| KR232758 | Madagascar         | 2011 | D | GenBank    |
| KR232761 | Madagascar         | 2011 | D | GenBank    |
| KR232763 | Madagascar         | 2011 | D | GenBank    |
| KR232775 | Madagascar         | 2011 | D | GenBank    |
| KR232776 | Madagascar         | 2011 | D | GenBank    |
| KR232778 | Madagascar         | 2011 | D | GenBank    |
| KR232782 | Madagascar         | 2011 | D | GenBank    |
| KR232793 | Madagascar         | 2011 | D | GenBank    |
| KR232796 | Madagascar         | 2011 | D | GenBank    |
| KU189236 | Poland             | 2001 | D | GenBank    |
| KU189240 | Poland             | 2001 | D | GenBank    |
| KU189242 | Poland             | 2001 | D | GenBank    |
| KU566507 | China              | 2013 | E | GenBank    |
| KU841463 | Russia             | 2013 | D | GenBank    |
| KU841464 | Russia             | 2013 | D | GenBank    |
| KY369904 | The United States  | 2016 | D | GenBank    |
| LC412980 | China              | 2017 | E | GenBank    |
| LYLS141  | China              | 2010 | E | This study |
| LYLS258  | China              | 2010 | E | This study |
| LYLS436  | China              | 2010 | E | This study |
| MF179586 | China              | 2014 | E | GenBank    |
| MF678300 | Australia          | 2010 | E | GenBank    |
| MF678319 | Australia          | 2010 | E | GenBank    |
| MG451808 | The United Kingdom | 2017 | D | GenBank    |
| MG845888 | The United States  | 2015 | D | GenBank    |
| MG922519 | China              | 2012 | E | GenBank    |
| MG922522 | China              | 2012 | E | GenBank    |
| MN896919 | The United States  | 2019 | D | GenBank    |
| MN896920 | The United States  | 2019 | D | GenBank    |
| MT641357 | The United Kingdom | 2017 | D | GenBank    |
| MT641411 | The United Kingdom | 2018 | D | GenBank    |
| MW179456 | China              | 2019 | E | GenBank    |

---

**Table S4.** Marginal likelihood estimates of the molecular clock model and coalescent model for the 186 CVB4 sequences used for the temporal dynamics analysis. The best-fitting model combination was highlighted in bolded font.

| Molecular clock model                        | Coalescent tree prior | PS              | SS              |
|----------------------------------------------|-----------------------|-----------------|-----------------|
| Strict clock                                 | Bayesian SkyGrid      | -14070.2        | -14068.2        |
| Strict clock                                 | Bayesian Skyline      | -14047.7        | -14053.4        |
| Strict clock                                 | Constant Size         | -14074.2        | -14083.2        |
| Strict clock                                 | Exponential Growth    | -14070.5        | -14068.0        |
| Strict clock                                 | GMRF Bayesian Skyride | -14135.7        | -14157.6        |
| Uncorrelated relaxed clock(exponential)      | Bayesian SkyGrid      | -14116.2        | -14126.4        |
| Uncorrelated relaxed clock(exponential)      | Bayesian Skyline      | -14110.7        | -13782.1        |
| Uncorrelated relaxed clock(exponential)      | Constant Size         | -14125.8        | -14136.3        |
| Uncorrelated relaxed clock(exponential)      | Exponential Growth    | -14116.9        | -14127.1        |
| Uncorrelated relaxed clock(exponential)      | GMRF Bayesian Skyride | -14172.9        | -14198.6        |
| Uncorrelated relaxed clock(lognormal)        | Bayesian SkyGrid      | -14076.8        | -14089.6        |
| Uncorrelated relaxed clock(lognormal)        | Bayesian Skyline      | -14049.2        | -14054.5        |
| <b>Uncorrelated relaxed clock(lognormal)</b> | <b>Constant Size</b>  | <b>-14070.7</b> | <b>-13589.3</b> |
| Uncorrelated relaxed clock(lognormal)        | Exponential Growth    | -14070.7        | -14067.0        |
| Uncorrelated relaxed clock(lognormal)        | GMRF Bayesian Skyride | -14133.0        | -14135.9        |



**Table S5.** Marginal likelihood estimation of the molecular clock model and coalescent model for the 60 CVB4 sequences used for the phylogeographic analysis. The best-fitting model combination was highlighted in bolded font.

| Molecular clock model                   | Coalescent tree prior | PS             | SS             |
|-----------------------------------------|-----------------------|----------------|----------------|
| Strict clock                            | Bayesian SkyGrid      | -6587.3        | -6581.5        |
| Strict clock                            | Bayesian Skyline      | -6589.4        | -6583.0        |
| <b>Strict clock</b>                     | <b>Constant Size</b>  | <b>-6589.5</b> | <b>-6578.5</b> |
| Strict clock                            | Exponential Growth    | -6590.3        | -6587.2        |
| Strict clock                            | GMRF Bayesian Skyride | -6614.3        | -6608.5        |
| Uncorrelated relaxed clock(exponential) | Bayesian SkyGrid      | -6617.6        | -6607.8        |
| Uncorrelated relaxed clock(exponential) | Bayesian Skyline      | -6616.6        | -6611.1        |
| Uncorrelated relaxed clock(exponential) | Constant Size         | -6617.9        | -6611.0        |
| Uncorrelated relaxed clock(exponential) | Exponential Growth    | -6618.6        | -6613.6        |
| Uncorrelated relaxed clock(exponential) | GMRF Bayesian Skyride | -6624.9        | -6620.0        |
| Uncorrelated relaxed clock(lognormal)   | Bayesian SkyGrid      | -6593.2        | -6587.0        |
| Uncorrelated relaxed clock(lognormal)   | Bayesian Skyline      | -6589.4        | -6580.1        |
| Uncorrelated relaxed clock(lognormal)   | Constant Size         | -6589.9        | -6585.7        |
| Uncorrelated relaxed clock(lognormal)   | Exponential Growth    | -6590.0        | -6587.2        |
| Uncorrelated relaxed clock(lognormal)   | GMRF Bayesian Skyride | -6610.6        | -6606.1        |

**Table S6.** Recombination results obtained by software RDP4 analysis.

| Strains   | Breakpoint           |                   | Major parent                        | Minor parent                      | Region of recombination           | P-value of the methods  |                         |          |                         |                         |                         |                         |
|-----------|----------------------|-------------------|-------------------------------------|-----------------------------------|-----------------------------------|-------------------------|-------------------------|----------|-------------------------|-------------------------|-------------------------|-------------------------|
|           | Beginning breakpoint | Ending breakpoint |                                     |                                   |                                   | RDP                     | Geneconv                | BootScan | MaxChi                  | Chimaera                | SiScan                  | 3Seq                    |
| AIP group | 0                    | 52-192            | JN695051/<br>CVB5/JL/<br>CHN/2010   | JN596587/<br>ECHO9/YN/CHN/2010    | VP4                               | 3.420×10 <sup>-30</sup> | 1.901×10 <sup>-27</sup> | NA       | 3.472×10 <sup>-19</sup> | 1.764×10 <sup>-15</sup> | 2.985×10 <sup>-31</sup> | NA                      |
|           | 4229-4349            | 6217-6549         | JN695051/<br>CVB5/JL/<br>CHN/2010   | JN596587/<br>ECHO9/YN/CHN/2010    | 2C,3AB,3C,<br>3D <sup>pol</sup>   | 3.420×10 <sup>-30</sup> | 1.901×10 <sup>-27</sup> | NA       | 3.472×10 <sup>-19</sup> | 1.764×10 <sup>-15</sup> | 2.985×10 <sup>-31</sup> | NA                      |
|           | 5534-5565            | 6504-6535         | KF812551/<br>ECHO20/YN/<br>CHN/2010 | KM890277/<br>CVA9/YN/<br>CHN/2009 | 3D <sup>pol</sup>                 | 3.791×10 <sup>-4</sup>  | 2.506×10 <sup>-3</sup>  | NA       | 6.917×10 <sup>-6</sup>  | 4.713×10 <sup>-6</sup>  | 2.780×10 <sup>-5</sup>  | 7.985×10 <sup>-5</sup>  |
| HCP group | 0                    | 22-94             | MF973162/<br>CVB4/USA               | JQ979292/<br>ECHO1/HeN/CHN/2010   | VP4                               | 2.185×10 <sup>-36</sup> | 4.486×10 <sup>-27</sup> | NA       | 1.186×10 <sup>-25</sup> | 9.434×10 <sup>-28</sup> | 3.057×10 <sup>-28</sup> | 4.218×10 <sup>-49</sup> |
|           | 2577-2593            | 6549              | MF973162/<br>CVB4/USA               | JQ979292/<br>ECHO1/HeN/CHN/2010   | 2A,2B,2C,3AB,3C,3D <sup>pol</sup> | 2.185×10 <sup>-36</sup> | 4.486×10 <sup>-27</sup> | NA       | 1.186×10 <sup>-25</sup> | 9.434×10 <sup>-28</sup> | 3.057×10 <sup>-28</sup> | 4.218×10 <sup>-49</sup> |
|           | 3568-3601            | 4529-4530         | KP289441/<br>ECHO14/ZJ/CHN/2013     | MN597951/<br>ECHO11/GD/CHN/2019   | 2C,3AB                            | 1.837×10 <sup>-11</sup> | NA                      | NA       | 3.021×10 <sup>-9</sup>  | 1.825×10 <sup>-13</sup> | NA                      | 1.402×10 <sup>-2</sup>  |

**Table S7.** Analysis of the spatial structure of CVB4 D and E genotypes.

| Statistic               | observed mean (95% HPD CIs) <sup>d</sup> | null mean (95% HPD CIs) | <i>P</i> -value |
|-------------------------|------------------------------------------|-------------------------|-----------------|
| AI <sup>a</sup>         | 1.06(0.80,1.27)                          | 5.70(5.01,6.26)         | <0.001          |
| PS <sup>b</sup>         | 11.91(11.00,12.00)                       | 34.98(32.40,37.19)      | <0.001          |
| MC <sup>c</sup> (China) | 19.30(18.00,21.00)                       | 2.33(1.71,3.95)         | 0.01            |
| MC (France)             | 1.00(1.00,1.00)                          | 1.00(1.00,1.00)         | 1               |
| MC (India)              | 4.00(4.00,4.00)                          | 1.26(1.00,2.00)         | 0.02            |
| MC (Australia)          | 2.00(2.00,2.00)                          | 1.06(1.00,1.60)         | 0.05            |
| MC (Madagascar)         | 15.00(15.00,15.00)                       | 1.89(1.02,3.00)         | 0.01            |
| MC (Poland)             | 2.00(2.00,2.00)                          | 1.04(1.00,1.17)         | 0.02            |
| MC (Russia)             | 1.00(1.00,1.00)                          | 1.00(1.00,1.00)         | 1               |
| MC (The United States)  | 2.41(2.00,3.00)                          | 1.03(1.00,1.17)         | 0.02            |
| MC (The United Kingdom) | 1.09(1.00,2.00)                          | 1.03(1.00,1.09)         | 1               |

<sup>a</sup>AI, association index.

<sup>b</sup>PS, parsimony score.

<sup>c</sup>MC, maximum monophyletic clade.

<sup>d</sup>HPD CIs, highest posterior density confidence intervals.

**Table S8.** Statistically supported migration rates of 60 CVB4 based on the *VP1* region.

| From              | To                 | Mean migration<br>rate | BF <sup>a</sup> | Indicator |
|-------------------|--------------------|------------------------|-----------------|-----------|
| The United States | The United Kingdom | 1.17                   | 93.87           | 0.93      |
| Russia            | The United Kingdom | 1.61                   | 40.53           | 0.85      |
| India             | Madagascar         | 1.12                   | 36.62           | 0.83      |
| China             | Australia          | 0.83                   | 34.13           | 0.82      |
| India             | The United States  | 1.14                   | 30.87           | 0.81      |
| India             | Australia          | 1.13                   | 25.99           | 0.78      |
| France            | India              | 1.14                   | 21.06           | 0.74      |
| Poland            | France             | 1.34                   | 20.54           | 0.74      |

<sup>a</sup>BF, Bayes factor. The BF value > 3 and indicator > 0.50 of statistically supported migration rates are shown.
